# Supplementary material for: Is ioflupane I123 injection diagnostically effective in patients with movement disorders and dementia? Pooled analysis of four clinical trials
Source: HighWire-hosted journal article supplement (doi:10.1136/bmjopen-2014-005122), 2014-07-01
Supplement: bmjopen-2014-005122supp_tableS1.pdf [file bmjopen-2014-005122supp_tableS1.pdf]

**Table S1.** Investigators who participated in the four clinical trials in this pooled analysis.

**DP008-003**

|                                                |                                                                                                                                                                                                                                 |
|------------------------------------------------|---------------------------------------------------------------------------------------------------------------------------------------------------------------------------------------------------------------------------------|
| Prof. EA van Royen,<br>MD, PhD                 | AMC: University of Amsterdam Medical Centre (Academisch Medisch Centrum), Director of Department of Nuclear Medicine                                                                                                            |
| Prof. Dr. WH Oertel                            | Chairman and Professor of Neurology, Department of Neurology, Klinikum, Philipps-University, Marburg, Germany                                                                                                                   |
| Prof. Dr. K Joseph                             | [Klinisch orientierte Tätigkeit auf dem Gesamtgebiet der Nuklearmedizin: 192 wissenschaftliche Veröffentlichungen]                                                                                                              |
| Prof. Dr. K Tatsch                             | Department of Nuclear Medicine, Klinikum Grosshadern, University of Munich, Marchioninstr. 15, 81377, Munich, Germany                                                                                                           |
| Dr. J Schwarz                                  | Neurologische Klinik, Universität Ulm, 89081 Ulm                                                                                                                                                                                |
| Dr. T Schwarz Müller,                          | University of Munich, Department of Nuclear Medicine, Klinikum Grosshadern,                                                                                                                                                     |
| Dr. R Linke                                    | Marchioninstr. 15, 81377 Munich, Germany                                                                                                                                                                                        |
| Dr. A Storch                                   | University of Ulm, Department of Neurology, Oberer Eselsberg 45, 89081 ULM, Germany                                                                                                                                             |
| Dr. V Ries                                     | Tätigkeit als Arzt im Praktikum an der Neurologischen Universitätsklinik Ulm                                                                                                                                                    |
| Ms. A Gerstner                                 | Tätigkeit als studentische Hilfskraft auf der internistisch/neurologischen Intensivstation des St. Josef-Hospitals Bochum                                                                                                       |
| Ms. S Rura                                     | Erstellung einer Doktorarbeit in der Arbeitsgruppe von Prof. Dr. W Oertel mit der Thematik Neuroprotektion im Parkinson-Tiermodell, Marburg                                                                                     |
| Dr. H Höffken (MD)                             | Abteilung für Klinische Nuklearmedizin, Zentrum Radiologie des Klinikums der Philippsuniversität Marburg, Baldingerstraße, 35033 Marburg                                                                                        |
| Dr. O Pogarell                                 | Department of Neurology, University of Marburg, Rudolf-Biltmann-Str. 8, D-35033 Marburg, Germany                                                                                                                                |
| Dr. H Fritsch                                  | Strahlenschutzbeauftragter der Abteilung für Klinische Nuklearmedizin, Steinweg 7, 35096 Weimar/Lahn                                                                                                                            |
| Dr. D Grosset (BSc,<br>MD, FRCP)               | Consultant Neurologist, Department of Neurology, Institute of Neurological Sciences, Southern General Hospital, Govan Road, Glasgow, G51 4TF                                                                                    |
| Dr. J Patterson (BSc,<br>PhD, MIPeM)           | Principal Physicist, Department of Clinical Physics, Institute of Neurological Sciences, Southern General Hospital NHS Trust, Glasgow, G51 4TF and Honorary Research Assistant, University of Glasgow, Glasgow G12 8QQ Scotland |
| Dr. H Ben Amer<br>(M.B B.ch, MRCP<br>(UK)      |                                                                                                                                                                                                                                 |
| T Murphy RGN                                   | Department of Neurology, Institute of Neurological Sciences, Southern General Hospital, 1345 Govan Road, Glasgow, GF1 4TF                                                                                                       |
| Dr. JD Speelman                                |                                                                                                                                                                                                                                 |
| Dr. MWIM Horstink<br>(MD, PhD)                 | University of Nijmegen                                                                                                                                                                                                          |
| Dr. J Booi                                     | AMC, the Netherlands                                                                                                                                                                                                            |
| Dr. J Versijpt                                 | Hoeksensstraat 130, 9080 Lochristie (getting PhD w/ Dr. Dierckx)                                                                                                                                                                |
| Dr. A Van den<br>Eeckhaut                      | Essestraat 83, 9340 Lede (w/ Dr. Dierckx)                                                                                                                                                                                       |
| Dr. AJ Lees (MB BS,<br>MRCP [UK], MD,<br>FRCP) | Consultant Neurologist to the National Hospital for Neurology and Neurosurgery and University College London Hospitals....                                                                                                      |

|                                                                                                                                                      |                                                                                                                                                                                                                                                                                                                                                                                                                              |
|------------------------------------------------------------------------------------------------------------------------------------------------------|------------------------------------------------------------------------------------------------------------------------------------------------------------------------------------------------------------------------------------------------------------------------------------------------------------------------------------------------------------------------------------------------------------------------------|
| Dr. DC Costa (MD,<br>MSc, PhD, FRCR<br>Dr. M Doder<br>Dr. H Sips<br>Prof. R Dierckx                                                                  | Institute of Nuclear Medicine, University College London Medical School,<br>Middlesex Hospital, Mortimer Street, London, W1N 8AA, UK                                                                                                                                                                                                                                                                                         |
| Dr. D Decoo<br>Dr. C Van Der<br>Linden<br>Dr. Rhiannon<br>Rowell, Dr. R<br>Robison, Mrs. B<br>McDougall, Mrs. V<br>Thody<br>Dr. T Frear              | Division of Nuclear Medicine, University Hospital Gent, De Pintelaan 185, B-<br>9000 Gent, Belgium<br>UZ Gent, Dienst Neurologie, De Pintelaan 185, 9000-GENT<br>Department of Neurology, University Hospital Gent, Gent, Belgium<br>Nycomed Amersham plc, White Lion Road, Little Chalfont, Buckinghamshire,<br>HP7 9NA, UK<br>Frear and Associates, 77 Benetfeld Road, Foxley Fields, Binfield, Berkshire,<br>RG42 4EW, UK |
| Mrs. M Cobb                                                                                                                                          | Nycomed Imaging, Clinical Research Associate, Nycomed Amersham plc,<br>White Lion Road, Little Chalfont, Buckinghamshire, HP7 9NA, UK                                                                                                                                                                                                                                                                                        |
| Mrs. R Sakowski                                                                                                                                      | General Manager/Clinical Trials Manager, Chiltern International GmbH, Ober-<br>Eschbacher Straße 91, 61352 Bgd Homburg v.d.H. Germany                                                                                                                                                                                                                                                                                        |
| Dr. C Deubelbeiss<br>(PhD)<br>Dr. M Titulaer, Dr. M<br>Al (MSc x 2, PhD)<br>HJW Adrianus<br>(PhD?)<br>Svetislav Gacinovic<br>(MsC, MD)               | Clinical Research Associate, Chiltern International GmbH, Berner Str. 49, D-<br>60437 Frankfurt, Germany<br>Farma Research BV, Nijmegen (CRO), the Netherlands<br>Als arts-assistant neurologie Radboudziekenhuis te Nijmegen<br>Institute of Nuclear Medicine, University College London Medical School,<br>Mortimer Street, London, W1A 8AA, UK                                                                            |
| <b>PDT301</b><br>Kendle GmbH & Co.<br>GMI KG<br>Pharm-Olam<br>International (UK)<br>Ltd<br>Pharm-Olam<br>International (UK)<br>Ltd,<br>Phidea S.p.A. | Georg-Brauchle-Ring 6, 81929 München, Germany<br>The Brackens, London Road, Ascot, Berkshire, RG42 7UT, UK<br>Jihovychodni VII, No. 11/928, 141 00 Prague 4, Zabealice, Czech Republic<br>Via C. Colombo 1, 20094 Corsico, Italy                                                                                                                                                                                             |
| Prof. Dr. Franz<br>Aichner<br>Prof. Dr. Susanne<br>Asenbaum<br>Prof. Dr. Jean M.<br>Orgogozo<br>Prof. Dr. Florence<br>Pasquier                       | OÖ Landesnervenklinik, Neurologische Abteilung, Wagner-Jauregg-Weg 15,<br>4020 Linz, Austria<br>Universitätshospital Wien, Abteilung Neurologie, Währinger Gürtel 18-20a,<br>1090 Wien, Austria<br>Université Bordeaux, Hôpital Pellegrin, Place Amélie Raba Léon, 33076<br>Bordeaux, France<br>Hôpital Roger Salengro, Rue Prof Emile Laine, 59000 Lille, France                                                            |

|                                                        |                                                                                                                                          |
|--------------------------------------------------------|------------------------------------------------------------------------------------------------------------------------------------------|
| Prof. Dr. Johannes Schwarz                             | Klinik und Poliklinik für Neurologie, Universitätsklinikum Leipzig, Liebigstr. 22a, 04103 Leipzig, Germany                               |
| Dr. Guy Arnold, PD Dr., Eike Spruth, PD Dr.            | Humboldt-Universität Berlin, Medizinische Fakultät Charité Mitte, Abteilung Neurologie, Schumannstr. 21, 10117 Berlin, Germany           |
| Dr. Prof. Thomas Müller                                | St. Josef-Hospital, Ruhr-Universität Bochum, Gudrunstr. 56, 44791 Bochum, Germany                                                        |
| Dr. Inga Zerr                                          | Georg-August Universität Göttingen, Abteilung Neurologie, Robert-Koch-Str. 40, 37075 Göttingen, Germany                                  |
| Prof. Dr. Cornelius Weiller, Prof. Dr. Achim Liepert   | Universitätsklinikum Eppendorf, Klinik und Poliklinik für Neurologie, Martinistr. 52 / N24, 20246 Hamburg, Germany                       |
| Prof. Dr. Reinhard Dengler                             | Neurologische Klinik mit klinischer Neurophysiologie, Medizinische Hochschule Hannover, Carl-Neuberg-Str. 1, 30625 Hannover, Germany     |
| PD Dr. Peter Urban, Dr. Andreas Fellgiebel             | Johannes-Gutenberg Universität Mainz, Klinik und Poliklinik für Neurologie, Langenbeckstr. 1, 55101 Mainz, Germany                       |
| Prof. Dr. Wolfgang Oertel                              | Klinikum der Phillips-Universität Marburg, Abteilung Neurologie, Rudolf-Bultmann-Str. 8, 35039 Marburg, Germany                          |
| Prof. Dr. Gilberto Pizzolato, Dr Gianluigi Riccherieri | Clinica Neurologica 1 – Dipartimento di Neuroscienze, Università di Padova, Via Giustiniani 5, 35128 Padova, Italy                       |
| Prof. Dr. Ubaldo Bonucelli                             | U.O. di Neurologia – Dipartimento di Neurologia, Università di Pisa, P.O. Santa Chiara – A.O. Pisana, Via Bonanno 54, 56126 Pisa, Italy  |
| Prof. Dr. Dag Aarsland                                 | Stavanger Universitetssjuehus, Dept: Psykiatrisk Klinikk, Alderspsykiatrisk Poliklinikk, PO Box 1163 Hillevåg, 4095 Stavanger, Norway    |
| Dr. Maria M Pareira Costa                              | HPP Medicina Molecular, SA, Avenida da Boavista, 119, 4050-115 Porto, Portugal                                                           |
| Prof. Dr. Lars-Olof Wahlund                            | Karolinska Universitetssjukhuset, Huddinge, Hälsovägen, Flemingsberg, 14186 Stockholm, Sweden                                            |
| Dr. Eduardo Tolosa Sarro                               | Hospital Clinic i Provincial, Unidad Memoria-Alzheimer, c/Villaroel, 170, 08036 Barcelona, Spain                                         |
| Dr. Lorenzo Morlán Gracia                              | Hospital Universitario de Getafe, Servicio de Neurologia, Ctra. De Toledo km 12,5, 28950 Getafe, Madrid, Spain                           |
| Dr. J Andrés Burguera                                  | Hospital Universitario La Fe, Consultas de Neurologia. Planta Baja, Avda Campanar, 21, 46009 Valencia, Spain                             |
| Dr. Thomas Alan                                        | Old Age Psychiatry Offices, Bensham General Hospital, Saltwell Road, Gateshead, NE8 4YL, UK                                              |
| Dr. Clive Holmes                                       | Memory Study and Research Centre, Moorgreen Hospital, Botley, West End, Southampton, Hampshire, SO30 3JB, UK                             |
| Prof. Dr. Adrian Danek                                 | Klinikum Großhadern der Ludwig-Maximilians-Universität, Klinik und Poliklinik für Neurologie, Marchioninistr. 15, 81377 München, Germany |
| Prof. Dr. Gerhard Ransmayr                             | Allgemeines Krankenhaus Linz, Abteilung Neurologie und Psychiatrie, Krankenhausstr. 9, 4021 Linz, Austria                                |
| Prof. Dr. Alessandro Padovani                          | Neurologia 2, Spedali Civili di Brescia, Piazzale Ospedale, 1, 25123 Brescia, Italy                                                      |

Prof. Dr. Jan Aasly St Olavs Hospital, Dept: Nevologisk avdeling, Olav Kyrres gate 17, 7006 Trondheim, Norway

Prof. Dr. Ulla Passant Universitetssjukhuset, Avd. For Geriatrisk Psykiatri, Klinikgatan 22, 22185 Lund, Sweden

Dr. Martin Bojar University Hospital Motol, 2nd School of Medicine, Charles University Prague, V Uvalu 84, 150 06 Prague 5, Czech Republic

Dr. Naji Tabet MRC Psych. Consultant and Senior Lecturer in Old Age Psychiatry, East Sussex County Healthcare NHS Trust, Beechwood Unit, Uckfield Community Hospital, Framfield Road, Uckfield, East Sussex, TN22 5AW, UK

Dr. E Jane Byrne School of Psychiatry and Behavioural Sciences, Education and Research Centre, Wythenshawe Hospital, Manchester, M23 9TL, UK

Dr. Peter J Conelly Murray Royal Hospital, Perth, PH2 7BH, UK

PD Dr. Elisabet Londos Universitetssjukhuset MAS, Neuropsykiatriska Kliniken, Simrisbanvägen 14, plan 3, 205 02 Malmö, Sweden

Dr. Giovanni Castelnovo CHU de Nîmes Hôpital Caremeau, Service de Neurologie Hôpital du Jour, Place Pr. Robert Debre, 30029 Nîmes Cedex 9, France

Prof. Dr. Alberto Albanese Istituto Nazionale Neurologico "Besta", Università Cattolica del Sacro Cuore, Via Caloria 11, 20133 Milano, Italy

Dr. Eulegio Gil Hospital Virgen del Rocío, Neurologie, Avd de Manuel Siurot s/n, 41013 Sevilla, Spain

Ordination Dr. Michael Rainer Lainzerstr. 20, 1130 Wien, Austria

Dr. Peter Bowie Longley Centre, Norwood Grange Drive, Sheffield, S5 7JT, UK

Prof. Dr. Gordon Wilcock BRACE Centre, Blackberry Hill Hospital, Fishponds, Bristol, BS16 2EW, UK

Dr. Rainhard Ehret Schloßstr. 29, 12163 Berlin, Germany

Prof. Dr. Alexander Kurz Psychiatrische Klinik der TU München, Moehlstr. 26, 81675 München, Germany

Prof. Dr. Jan Booij Department of Nuclear Medicine, Academic Medical Centre, Meibergdreef 9, Postbus 22660, 1105 AZ Amsterdam Zuidoost, Netherlands

Prof. Dr. Jacques Darcourt Laboratoire de Biophysique et Traitement de l'Image, Faculte de Medicine, Universitede Nice Sophia-Antipolis, 28 Avenue de Valombrose, 06107 Nice, Cedex 2, France

Prof. Dr. Klaus Tatsch Ludwig-Maximilians Universität, Klinikum Großhadern, Abteilung für Nuklearmedizin, Marchioninistrasse 15, D-81377 München

Dr. Frode Willoch Aker sykehus, Radiologisk avdeling, Trondheimsveien 235, 0514 Oslo, Norway

Dr. Zuzana Walker University College London, Department of Mental Health Sciences, 48 Riding House Street, London, W1P 8AA, UK

Prof. Dr. Ian McKeith, Prof. Dr. John O'Brien Newcastle General Hospital, Institute for Health and Aging, Newcastle uponTyne, NE4, 6BE, UK

CRL.Medinet Bergschot 71, P.O. Box 5510, 4801 DM Breda, The Netherlands

**PDT304**

Dr. Donald Grosset, Dr. James Patterson, Dept of Neurology, Southern General Hospital, 1345 Govan Road, Glasgow, G51 4TF

Angela O'Donnell,  
Mary Theresa  
Hansen, Bianca  
Holmes, David  
Brown, Tracey Jones,  
Katherine Grosset,  
Marlene Smeaton,  
Donald Hadley, Kate  
MacFarlane Bryce,  
Elaine Tyrell

Prof. W Oertel, Anja  
Gerstner, Helmut  
Höffken, Prof.

Joseph, Meike L  
Schipper, Doris Lang  
Pfeiffer, Aline Metz,  
Andreas Fischer,  
Martin Gotthardt,  
Sylvia Rura, Halina  
Pollum, Thomas Behr

Dr. Hani BenAmer,  
Christopher Martin

Boiven, Philip  
Anderson, Jillian  
Andrews, Susan  
Ackrill, Lindsey  
Halliburton, Jill  
Conley, Alan Deakin,  
Elizabeth McLelland,  
David Borell,  
Richard Michael  
Poyner

Dr. Paul Kemp, Lucy  
Bolton, Helen  
Roberts, James  
Thom, Ian Gove,  
Livia Bolt, John S.  
Fleming, Sandra  
Johns, Maureen  
Zivanovic, Syed  
Zaman

Dr. David Burn, John  
Fenwick, Andrea  
Stutt, Una Brechany,  
Susan Faulkner,  
Sophie Molloy,

Klinikum der Phillips - Universität Marburg, Med Zentrum for  
Nervenheilkunde, Klinik für Neurologie, Rudolf-Bultmann - Strasse 8, D 35039  
Marburg, Germany

EEG Department, New Cross Hospital, Wednesfield Road, Wolverhampton,  
WV10 0QP, UK

Dept Nuclear Medicine, Southampton General Hospital, Tremona Road,  
Southampton SO16 6YD, UK

Newcastle General Hospital, Westgate Road, Newcastle upon Tyne, NE4 6BE,  
UK

|                                                                                                                                                                    |                                                                                                                         |
|--------------------------------------------------------------------------------------------------------------------------------------------------------------------|-------------------------------------------------------------------------------------------------------------------------|
| Prof. Eduardo Tolosa, Francisco Lomena, Francesco Valldeoriola, Jose Javier Mateo, Maria Luisa Ortega, Maria Jose Marti                                            | Servicio de Neurologia, Hospital Clinic I Provincial, c/Villaroel No. 170, 08036 Barcelona, Spain                       |
| Dr. Jaime Kulisevsky, Berta Pascual, Ana M Catafau, Jolanda Aguilar Puente, Angel Hernandez Fructuoso, Antonia Campolongo, Montserrat Estorch                      | Sevicio de Neurologia, Hospital de la Santa Creu I Sant Pau, Paseo San Antonio Maria Claret 167, 08025 Barcelona, Spain |
| Dr. T van der Borgh, Eric Mormont                                                                                                                                  | Dept of Nuclear Medicine, University Hospital UCL, Mont-Godinne, 5530 Yvoir, Belgium                                    |
| Prof. Luis Cunha, Joao Pedroso de Lima, Joao Manuel Almeida Neto, M Cunha                                                                                          | Servicio de Neurologia, Hospitais da Universidade de Coimbra, Av. Bissaya Barretto, P-3000-075 Coimbra, Portugal        |
| Prof W Poewe, Prof Roy Moncayo, Georg Riccabona, Eveline M Donnemiller, Klaus Seppi, Boris Becket Aurel, Clemens Decristoforo, Michael Gabriel, Dirk Rudiger Hente | Leopold-Franzens-Universität, Innsbruck, Universitätsklinikum für Neurologie, Anichstr. 35, A-6020 Innsbruck, Austria   |
| <b>PDT408</b>                                                                                                                                                      |                                                                                                                         |
| Prof. Eduardo Tolosa                                                                                                                                               | Dept of Neurology, H. Clinic I Provincial, Barcelona, Spain                                                             |
| Dr. Ana Catafau                                                                                                                                                    | Dept of Nuclear Medicine, H. Sant Pau, Barcelona, Spain                                                                 |
| Patrice Laloux, Thierry Vander Borgh                                                                                                                               | University Hospital UCL, Mont-Godinne, B-5530 YVOIR, Belgium                                                            |
| Michel Van Zandijcke, Frank De Geeter                                                                                                                              | AZ St Jan, Ruddershove 10, B-8000, BRUGGE, Belgium                                                                      |
| Alain Destee, Marc Steinling                                                                                                                                       | Hôpital Roger Salengro-CHU de Lille, Rue du 8 Mai 1945, 59037 LILLE cedex, France                                       |
| Lucette Lacomblez, Marie-Odile Habert                                                                                                                              | Hopital Pitie Salpetriere, 47-83 Boulevard de l'Hôpital, 75651 PARIS cedex 13, France                                   |

Cornelius Weiller, Universitäts-Krankenhaus Eppendorf, Martinstraße 52, D-20246 HAMBURG,  
Malte Clausen Germany  
Ulrich Bogdahn, Chr. Universität Regensburg, Klinik und Poliklinik für Neurologie im  
Eilles Bezirksklinikum, Universistraße 84, D-93053 REGENSBURG, Klinikum der  
Universität Regensburg, Abt. f. Nuklearmedizin, Franz-Josf-Strauß-Allee 11, D-  
93053 REGENSBURG, Germany

Anton Haas, Carl- Universitätskliniken des Saarlandes, Kirrberger Straße, D-66421,  
Martin Kirsch HOMBURG/SAAR, Germany  
Angelo Antonini, Centro Parkinson, C.T.O., Az. Osp. Istituti Clinici di Perfezionamento, Via  
Riccardo Benti Bignami 1, I-20126 MILAN, Ospedale Maggiore di Milano, I.R.C.C.S.,  
Padiglione Granelli, Via F. Sforza 35, I-20122 MILAN, Italy

Sandro Sorbi, Alberto Università di Firenze, Viale Morgagni 85, I-50134 FLORENCE, Italy  
Pupi

Luis Cunha, João Hospitais da Universidade de Coimbra, Av. Bissaya Barreto, P-3000-075  
Pedroso de Lima COIMBRA  
Eduardo Tolosa, Hospital Clinic i Provincial, Villarroel, 170, E-08036 BARCELONA, Spain  
Francisco Lomeña

Jaime Kulisevsky, Hospital de la Santa Creu i Sant Pau, Paseo San Antonio María Claret, 167, E-  
Ana M Catafau 08025 BARCELONA, Spain  
Ray Chaudhuri, King's College Hospital, Denmark Hill, CAMBERWELL, SE5 9RS, UK  
Muriel Buxton-  
Thomas

William RG Gibb, Southampton General Hospital, Tremona Road, SOUTHAMPTON S016 6YD,  
Paul M Kemp UK  
Susanne Asenbaum, Allgemeines Krankenhaus der Stadt Wien, Währingergürtel 18-20, A-1090  
Robert Dudczak VIENNA, Austria
