# Supplementary material for: Is ioflupane I123 injection diagnostically effective in patients with movement disorders and dementia? Pooled analysis of four clinical trials
Source: HighWire-hosted journal article supplement (doi:10.1136/bmjopen-2014-005122), 2014-07-01
Supplement: bmjopen-2014-005122supp_tableS1.pdf [file bmjopen-2014-005122supp_tableS1.pdf]

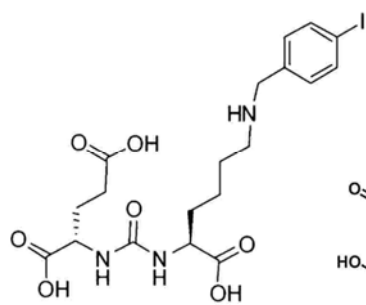

**MIP-1072**

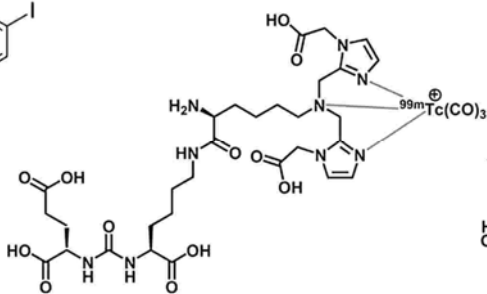

**$^{99m}\text{Tc}$ -MIP-1405**

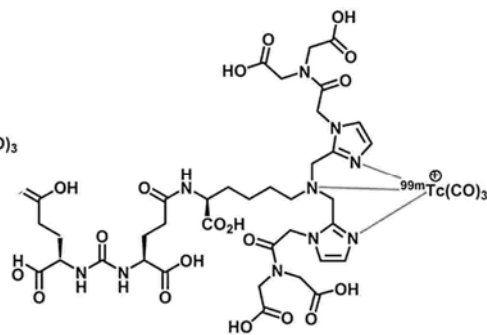

**$^{99m}\text{Tc}$ -MIP-1404**

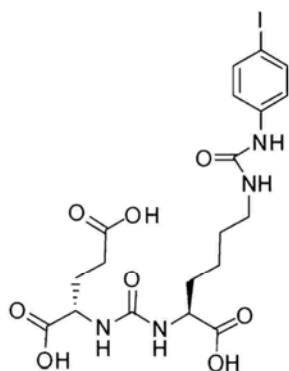

**MIP-1095**

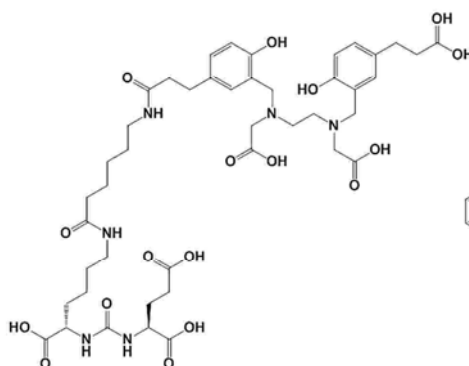

**PSMA-11**

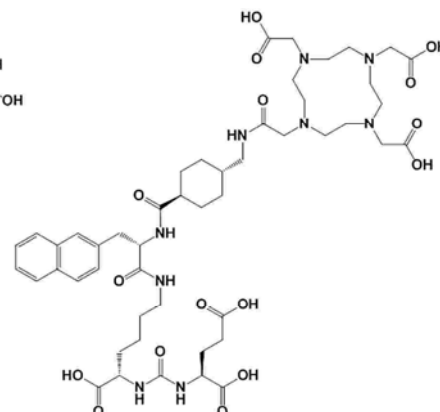

**PSMA-617**

**SUPPLEMENTAL FIGURE 1.** Chemical structures of different PSMA ligands.

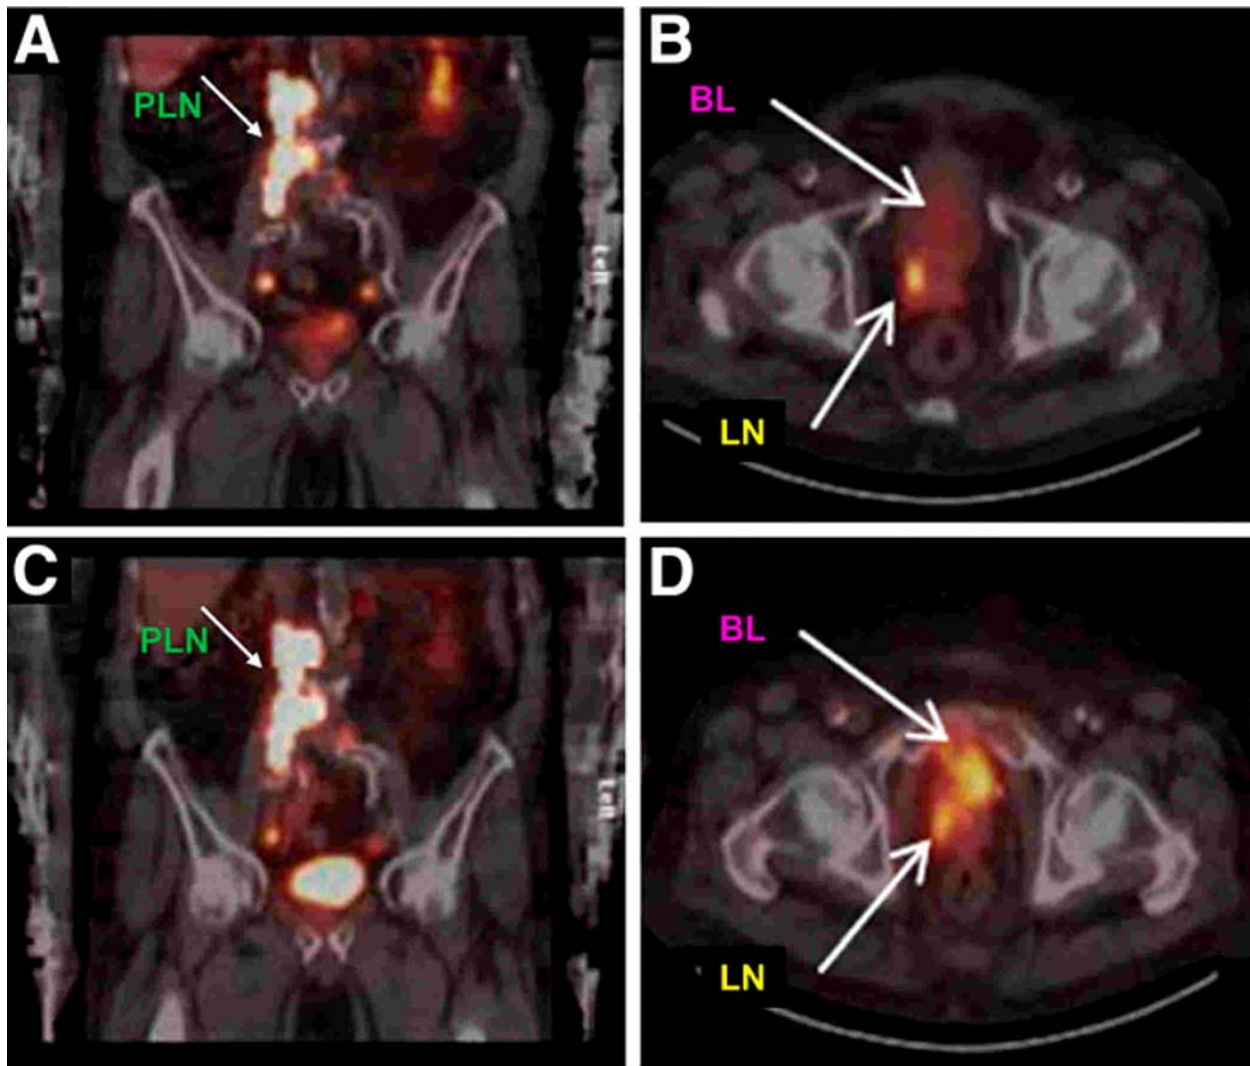

**SUPPLEMENTAL FIGURE 2.** SPECT/CT images of  $^{99m}\text{Tc}$ -MIP-1404 (A and B) compared with  $^{99m}\text{Tc}$ -MIP-1405 (C and D) in the same subject approximately a week apart. Images identify PCa in pelvic lymph nodes (LN) and paraaortic lymph nodes (PLN).  $^{99m}\text{Tc}$ -MIP-1404 shows minimal urinary excretion and bladder (BL) activity compared with  $^{99m}\text{Tc}$ -MIP-1405. (Reprinted from *J Nucl Med.* 2014;55:1791–1798.)

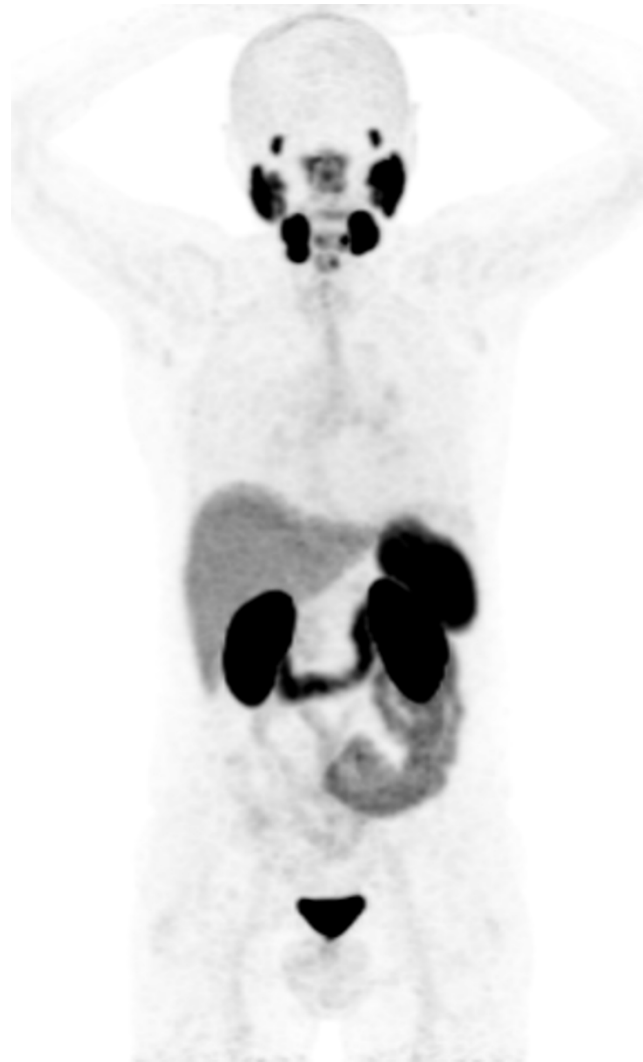

**SUPPLEMENTAL FIGURE 3.** Maximum-intensity projection of a patient with a normal distribution of  $^{68}\text{Ga}$ -PSMA-11 at 1 h after injection. Physiologic accumulation is seen in lacrimal and salivary glands, nasal mucosa, liver, spleen, bowels, and kidneys. The surplus tracer is excreted via the urinary tract and urinary bladder.

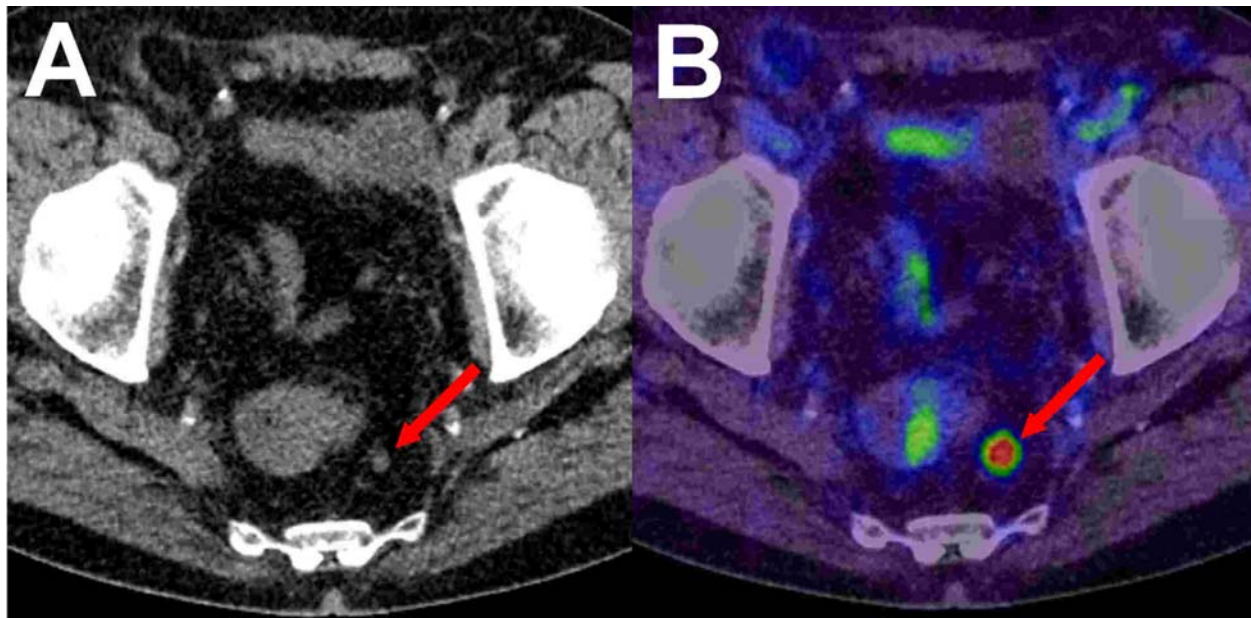

**SUPPLEMENTAL FIGURE 4.**  $^{68}\text{Ga}$ -PSMA-11 PET/CT images at 1 h after injection. Red arrows point to a lymph node metastasis with an  $\text{SUV}_{\text{max}}$  of 21.7 at 1 h (32.6 at 3 h after injection). (A) Low-dose CT. (B) Fusion of PET and CT.

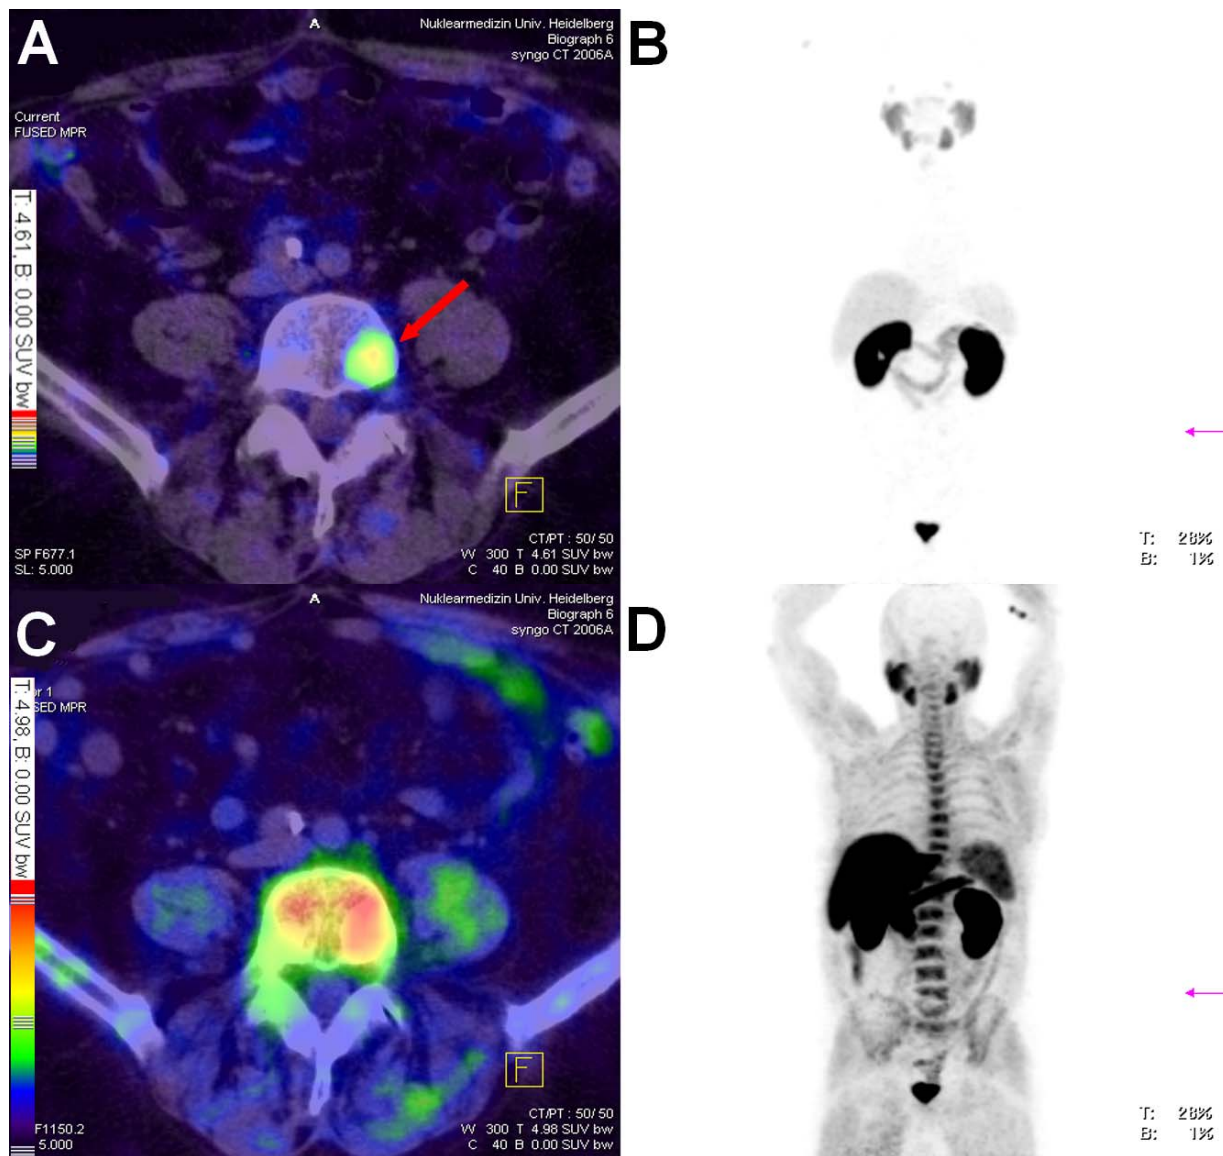

**SUPPLEMENTAL FIGURE 5.** Comparison between  $^{18}\text{F}$ -FM-choline and  $^{68}\text{Ga}$ -PSMA-11 in a patient with recurrent PCa. Red arrow points to a vertebral metastasis visible on  $^{68}\text{Ga}$ -PSMA-11 PET/CT only (A). Because of physiologic high background activity in the vertebral column, metastases are frequently difficult to detect on choline PET (C). Also typical of choline PET is a relatively high background activity, as seen in the maximum-intensity projection (D). Image data are provided as automatically produced by the PET/CT machine to demonstrate that the filtering of the maximum-intensity projections was set equal. (A) Fusion of  $^{68}\text{Ga}$ -PSMA-11 PET and CT. (B) Maximum-intensity projection of  $^{68}\text{Ga}$ -PSMA-11 PET. (C) Fusion of  $^{18}\text{F}$ -FM-choline PET and CT. (D) Maximum-intensity projection of  $^{18}\text{F}$ -FM-choline. Color scales are as automatically produced by the PET/CT machine. (Reprinted with permission from *Eur J Nucl Med Mol Imaging*. 2014;41:11–20 (57).



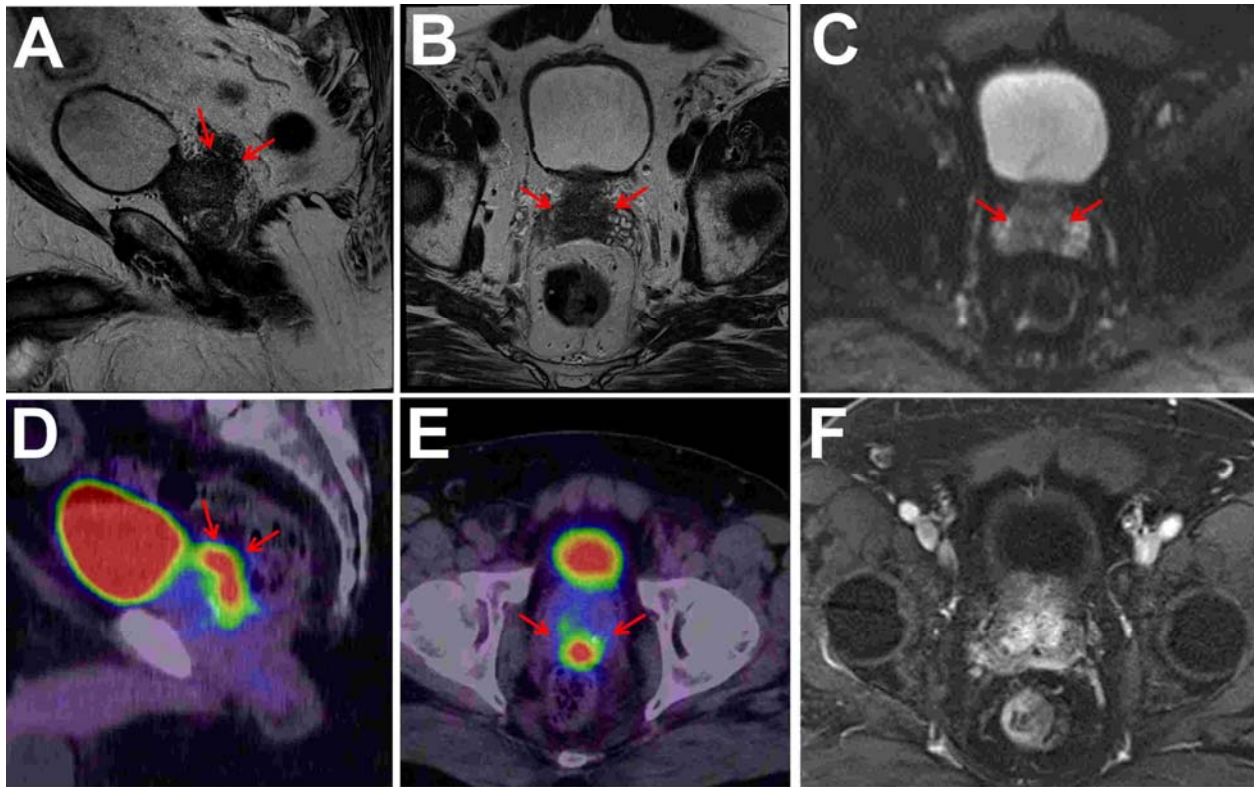

**SUPPLEMENTAL FIGURE. 6.** Primary PCa with infiltration of seminal vesicles visible on MRI (A–C) and on  $^{68}\text{Ga}$ -PSMA-11 PET/CT (D and E). (A) Sagittal T2-weighted MR image. (B) Transversal T2-weighted MR image. (C) Diffusion-weighted MR image. (D) Sagittal  $^{68}\text{Ga}$ -PSMA-11 PET/CT image. (E) Transversal  $^{68}\text{Ga}$ -PSMA-11 PET/CT image. (F) Contrast-enhanced T1-weighted MR image.
