# Supplementary material for: Is ioflupane I123 injection diagnostically effective in patients with movement disorders and dementia? Pooled analysis of four clinical trials
Source: HighWire-hosted journal article supplement (doi:10.1136/bmjopen-2014-005122), 2014-07-01
Supplement: bmjopen-2014-005122supp_tableS3.pdf [file bmjopen-2014-005122supp_tableS3.pdf]

**Table S3.** Demographic characteristics and clinical diagnosis (per Reference Clinical Diagnosis) by study – PP population (N = 622)

|                                 |           | Study                          |                             |                             |                          |                            |
|---------------------------------|-----------|--------------------------------|-----------------------------|-----------------------------|--------------------------|----------------------------|
|                                 |           | <b>DP008-003<br/>(N = 157)</b> | <b>PDT304<br/>(N = 100)</b> | <b>PDT301<br/>(N = 288)</b> | <b>PDT408<br/>(N=77)</b> | <b>Total<br/>(N = 622)</b> |
| <b>Age (yr)</b>                 | Mean (SD) | 63.1 (8.51)                    | 60.5 (10.97)                | 74.2 (7.02)                 | 64.1 (12.05)             | 67.9 (10.61)               |
|                                 | Min, Max  | 40, 80                         | 33, 79                      | 54, 90                      | 25, 84                   | 25, 90                     |
|                                 | Median    | 64.0                           | 61.5                        | 75.0                        | 67.0                     | 69.0                       |
| <b>Gender</b>                   | Male      | 99 (63%)                       | 57 (57%)                    | 160 (56%)                   | 40 (52%)                 | 356 (57%)                  |
|                                 | Female    | 58 (37%)                       | 43 (43%)                    | 128 (44%)                   | 37 (48%)                 | 266 (43%)                  |
| <b>Race</b>                     | Caucasian | 153 (97%)                      | 100 (100%)                  | 288 (100%)                  | 76 (99%)                 | 617 (99%)                  |
|                                 | Black     | 3 (2%)                         | 0 (0%)                      | 0 (0%)                      | 0 (0%)                   | 3 (<1%)                    |
|                                 | Asian     | 1 (1%)                         | 0 (0%)                      | 0 (0%)                      | 1 (1%)                   | 2 (<1%)                    |
|                                 | Other     | 0 (0%)                         | 0 (0%)                      | 0 (0%)                      | 0 (0%)                   | 0 (0%)                     |
| <b>PS (SDDD)</b>                |           | 115 (73%)                      | 69 (69%)                    | 0 (0%)                      | 47 (61%)                 | 231 (37%)                  |
| <b>Possible PS</b>              |           | 115 (73%)                      | 5 (5%)                      | 0 (0%)                      | 47 (61%)                 | 167 (27%)                  |
| <b>Probable PS</b>              |           | 0 (0%)                         | 64 (64%)                    | 0 (0%)                      | 0 (0%)                   | 64 (10%)                   |
| <b>DLB (SDDD)</b>               |           | 0 (0%)                         | 0 (0%)                      | 110 (38%)                   | 0 (0%)                   | 110 (18%)                  |
| <b>Possible DLB</b>             |           | 0 (0%)                         | 0 (0%)                      | 25 (9%)                     | 0 (0%)                   | 25 (4%)                    |
| <b>Probable DLB</b>             |           | 0 (0%)                         | 0 (0%)                      | 85 (30%)                    | 0 (0%)                   | 85 (14%)                   |
| <b>Non-PS/Non-DLB (no SDDD)</b> |           | 42 (27%)                       | 31 (31%)                    | 123 (43%)                   | 30 (39%)                 | 226 (36%)                  |
| <b>ET</b>                       |           | 16 (10%)                       | 14 (14%)                    | 0 (0%)                      | 23 (30%)                 | 53 (9%)                    |
| <b>AD</b>                       |           | 0 (0%)                         | 0 (0%)                      | 122 (42%)                   | 0 (0%)                   | 122 (20%)                  |
| <b>Other</b>                    |           | 26 (17%)                       | 17 (17%)                    | 1 (<1%)                     | 7 (9%)                   | 51 (8%)                    |
| <b>SDDD Present<sup>a</sup></b> |           | 115 (73%)                      | 69 (69%)                    | 110 (38%)                   | 47 (61%)                 | 341 (55%)                  |
| <b>SDDD Absent</b>              |           | 42 (27%)                       | 31 (31%)                    | 123 (43%)                   | 30 (39%)                 | 226 (36%)                  |

<sup>a</sup>Includes Possible and Probable PS and Possible and Probable DLB diagnoses.

AD = Alzheimer's disease; DLB = Dementia with Lewy bodies; ET = Essential tremor; N = number of subjects in the study; PP = Per protocol; PS = Parkinsonian syndrome; SD = standard deviation; SDDD = striatal dopaminergic deficit disorder.
